# Supplementary material for: Effect of the ambient conditions on the operation of a large-area integrated photovoltaic-electrolyser
Source: Royal Society of Chemistry journal article supplement (doi:10.1039/d0se00921k), 2020-01-01
Supplement: d0se00921k1.pdf [file d0se00921k1.pdf]

## Supplementary Information: Effect of the ambient conditions on the operation of a large-area integrated photovoltaic-electrolyser

Erno Kemppainen, Stefan Aschbrenner, Fuxi Bao, Aline Luxa, Christian Schary, Radu Bors, Stefan Janke, Iris Dorbandt, Bernd Stannowski, Rutger Schlatmann, Sonya Calnan

### 1. Irradiance and temperature dependency of PV performance

The figures in this section show the irradiance and temperature dependency of the short circuit current, maximum power point current and maximum power of a standalone silicon heterojunction PV mini-module similar to the one used for the integrated photovoltaic electrolyser. The  $-0.013 \text{ W/}^\circ\text{C}$  slope in Figure S1.6. corresponds to an efficiency reduction of about  $-0.044 \text{ \%/}^\circ\text{C}$  (absolute), when normalized with the total collection area of  $294 \text{ cm}^2$  and to about  $-0.056 \text{ \%/}^\circ\text{C}$  (absolute) with the active area of  $228 \text{ cm}^2$ .

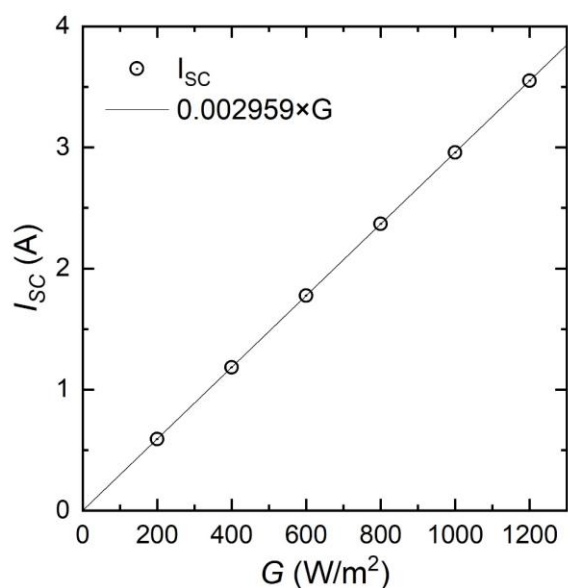

**Figure S1.1.** Irradiance dependency of the experimentally determined short circuit current of a silicon heterojunction PV mini-module at a module temperature of  $25^\circ\text{C}$  compared with a linear fit extrapolated to  $1000 \text{ W/m}^2$

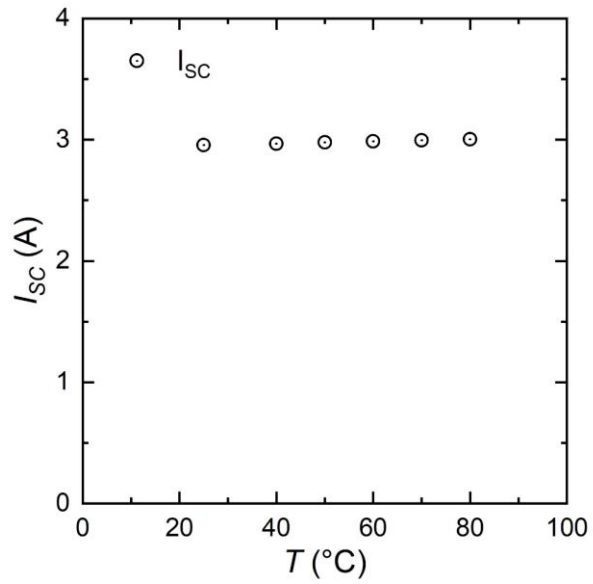

**Figure S1.2.** Temperature dependency of the experimentally determined short circuit current of a silicon heterojunction PV mini-module at a fixed irradiance of 1000 W/m<sup>2</sup>

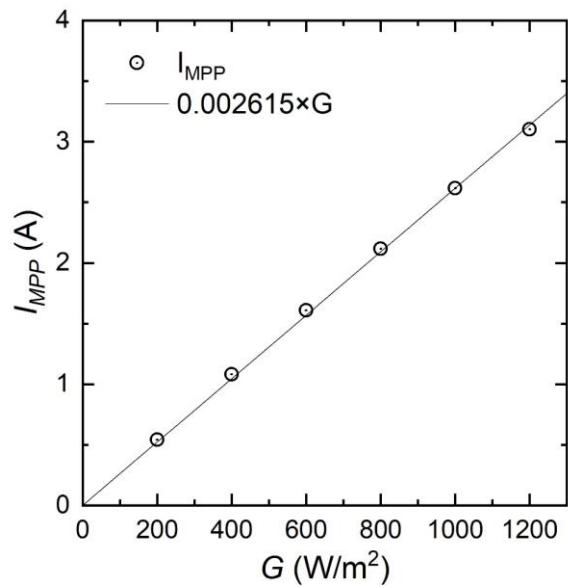

**Figure S1.3.** Irradiance dependency of the experimentally determined maximum power point current (circles) at 25 °C compared with a linear fit extrapolated to 1000 W/m<sup>2</sup>

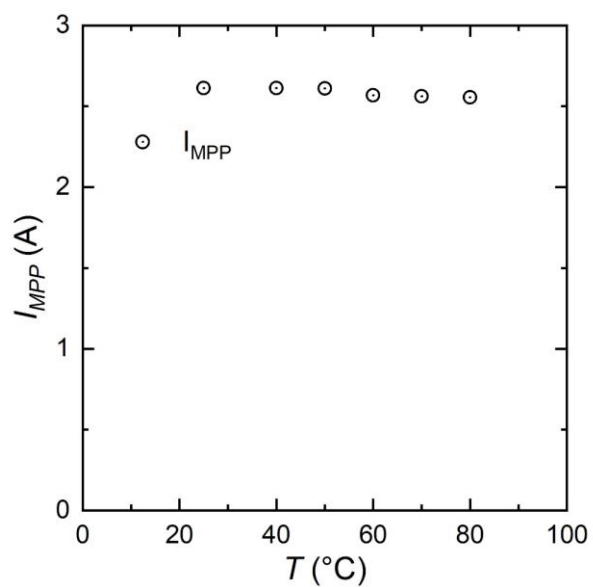

**Figure S1.4.** Temperature dependency of the experimentally determined maximum power point current under 1000 W/m<sup>2</sup> at 25–80 °C

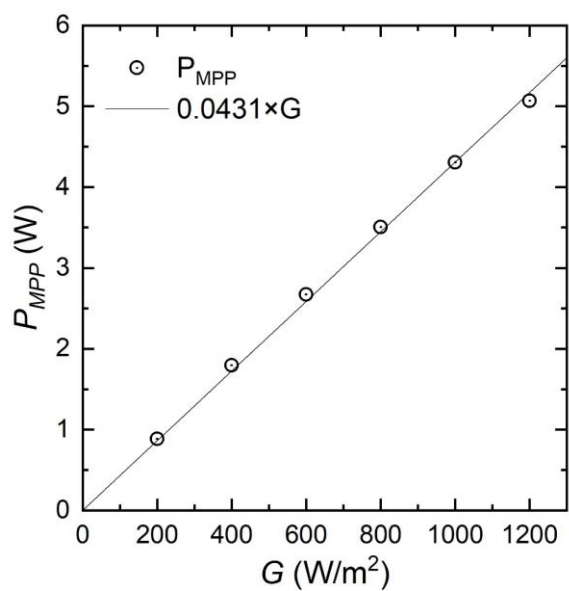

**Figure S1.5.** Irradiance dependency of the experimentally determined maximum power compared with a linear fit extrapolated to 1000 W/m<sup>2</sup>

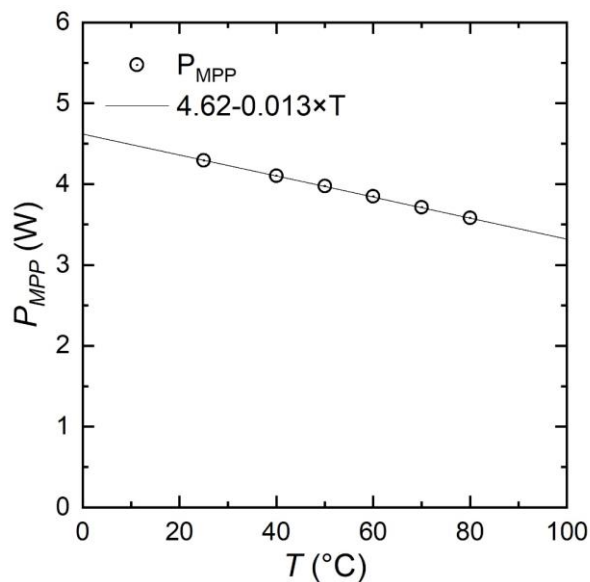

**Figure S1.6.** Temperature dependency of the experimentally determined maximum power under 1000 W/m<sup>2</sup> with a linear fit

## 2. HER and OER reaction kinetics

Figure S2.1. shows the HER (a) and OER (b) reaction kinetics on plain Ni foam and on catalyst covered Ni foam in 1.0 M KOH at 25 °C. In all cases a 5 cm × 6 cm graphite plate was used as the counter electrode and Hg/HgO filled with 1.0 M KOH as the reference electrode (+0.927 V vs RHE at 25 °C<sup>1,2</sup>). Depending on the current density, both NiMo and NiFe show a circa 50–70 mV improvement over plain Ni. The area immersed in the electrolyte is about 1.0 cm<sup>2</sup> in all cases, and the pores leading to the rest of the foam above the liquid are blocked with epoxy to prevent them from being in contact with the electrolyte due to capillary effect.

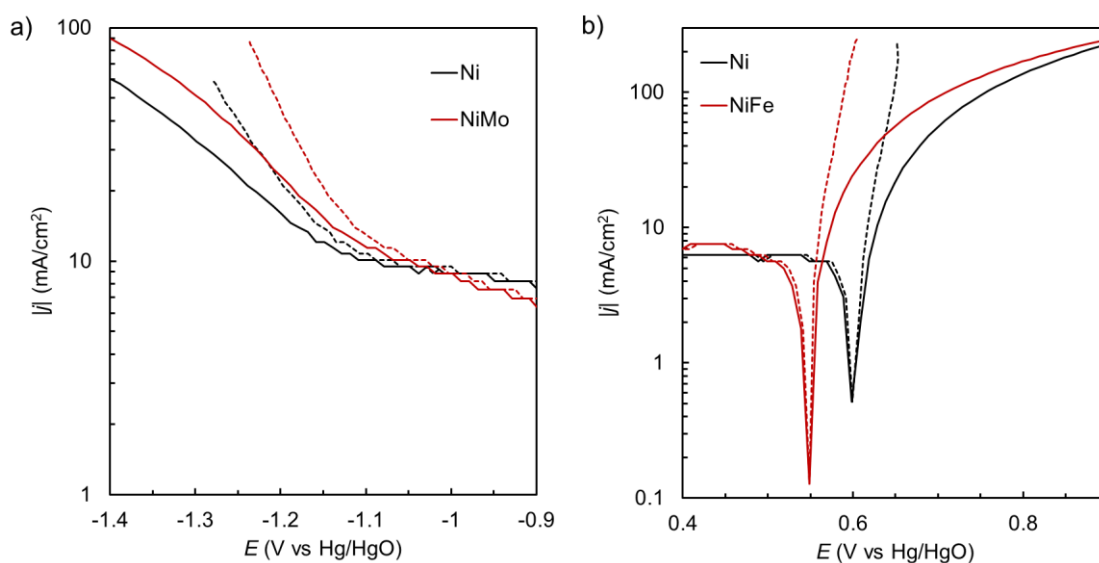

**Figure S2.1.** The reaction kinetics of a) the HER and b) the OER in 1.0 M KOH at 25 °C using graphite plate counter electrode and Hg/HgO reference electrode. In both cases plain Ni foam is marked with black, data as measured with solid lines and 100 % IR compensated with dashed lines. The red lines correspond to the catalyst coated Ni foams, in a) NiMo and in b) NiFe.

### 3. Simulations for device development

The geometry scheme is shown in Figure S3.1. In most cases the electrochemical kinetics parameters that we used corresponded to the kinetics on Ni foam. Minimizing the electrode separation was expectedly noticed to be an effective way to reduce resistive losses in the electrolyte and thus an essential improvement in the design. Further improvements could have been gained by minimizing the electrolyte volume around the electrode (i.e. small  $dX$ ,  $dY$ ,  $dZ$ ), but we could not implement this change in the design within the available time. This improvement would have been a combination of reduced  $H_2$  and  $O_2$  transport losses and also reduced  $OH^-$  transport losses (at high currents). The likely reason for these improvements is that for a given electrolyte flow rate, the liquid velocity inside the electrolyser would have been higher, sweeping the reaction products away and refreshing the KOH within the electrodes more efficiently. The slope of the  $OH^-$  transport losses in Figure S3.2. a)(i.e. resistive losses in the electrolyte and over the separator membrane) at less than 2.0 A indicates about 40–50 m $\Omega$  resistance for the zero-gap configurations, depending on the electrolyte volume.

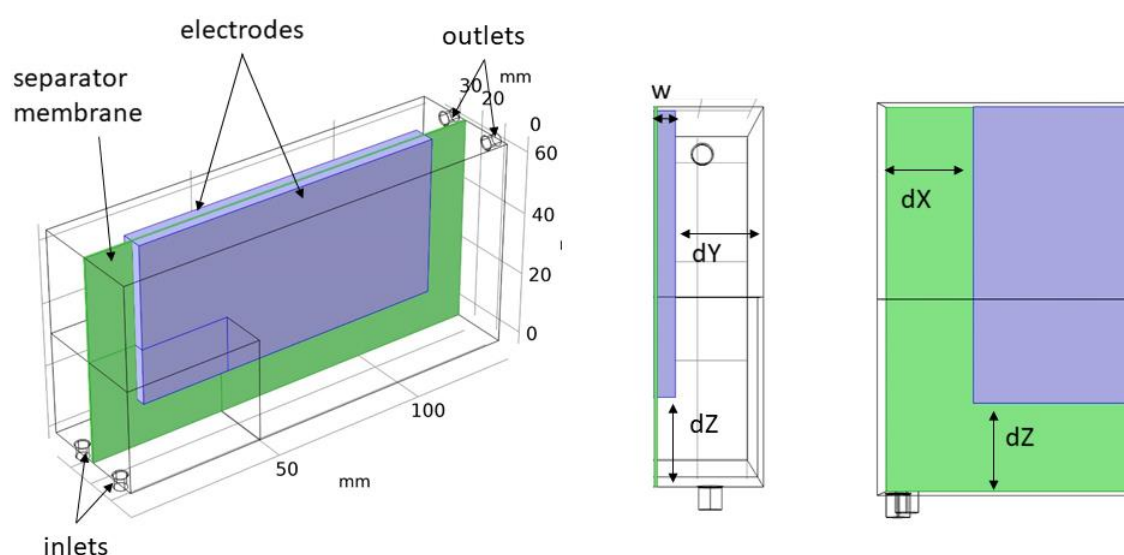

**Figure S3.1.** The electrolyser geometry used in the simulations and the geometrical parameters relating to the size of the electrolyser.

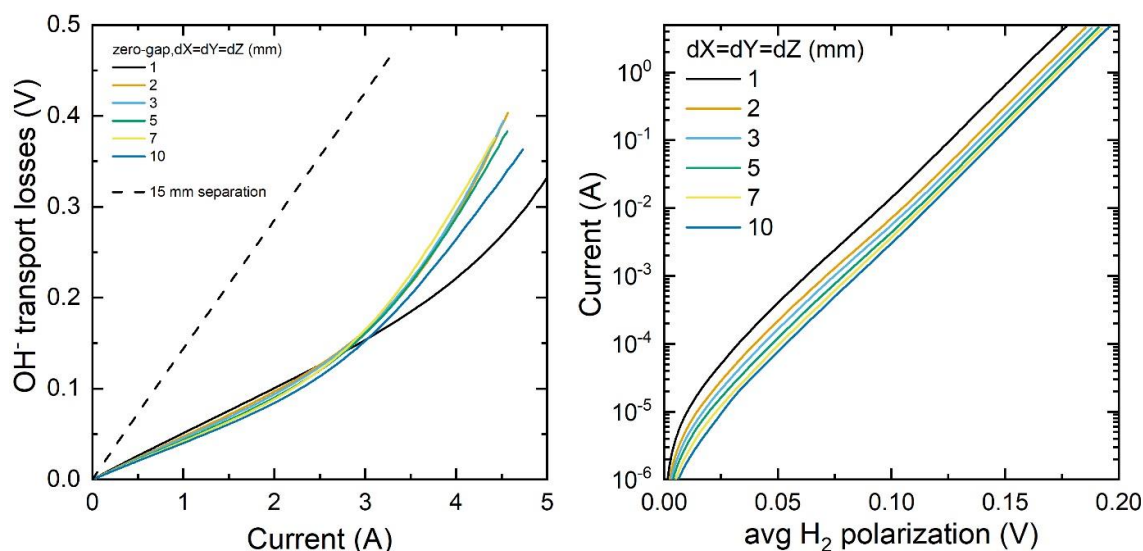

**Figure S3.2.** Left: Simulated resistive losses in the electrolyte as a function of the extra space around the electrode with zero-gap configuration (distance to chamber wall 1–10 mm) compared with 15 mm electrode separation. Right: Simulated H<sub>2</sub> polarization losses at the cathode

When testing different electrode thicknesses, it was noticed that increased thickness would be an improvement only up to a certain current per geometric electrode area (in the example in Figure S3.3. 40–50 mA/cm<sup>2</sup>). At higher currents, the lower mass transport losses made the thinnest electrodes the best solution, despite the reduced active interface area. Because it was considered more likely that the mass transport losses would be underestimated than overestimated, and because our aim was at the current range where a thin electrode seemed the best solution, the electrode thickness was reduced to the minimum, a single piece of Ni foam covered with catalysts. In hindsight, the device might have performed slightly better with thicker electrodes, but overall the changes constitute a clear improvement, most of which comes from minimizing the electrode separation and being able to deposit electrocatalysts on large areas.

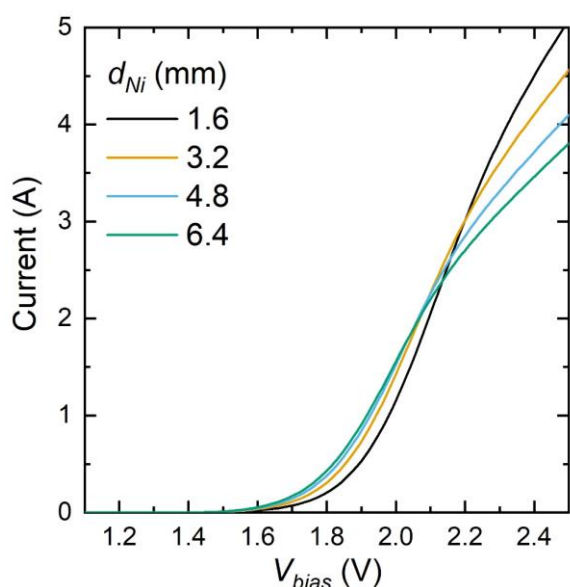

**Figure S3.3.** The simulated effect of the electrode thickness on the electrolyser IV-curve (with dX=dY=dZ= 5 mm, when comparing to Figure S3.2.)

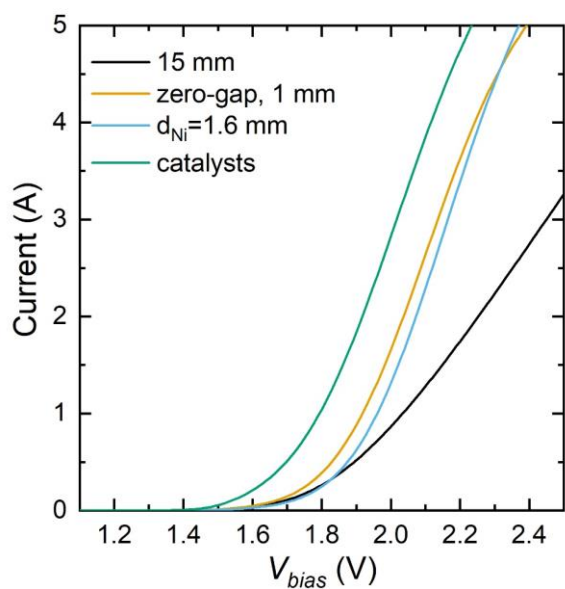

**Figure S3.4.** Simulated changes to the  $IV$ -curve from plain Ni electrodes at a 15 mm separation (legend: 15 mm) to a zero-gap design with minimized electrolyte volume (zero-gap, 1 mm), to reducing the electrode thickness to a single foam sheet ( $d_{Ni}=1.6$  mm) and depositing electrocatalysts on the Ni foams (catalysts).

#### 4. Outdoor and indoor measurement transients

As mentioned in the article, the example transients shown in the article are not the only measurements we did, and the other transients included in the analysis are shown here in chronological order. The 5-minute averages correspond to the points in the scatter plots Figures 4 and 9–12, excluding points when the device was covered and not operating. Except for the measurement on 29<sup>th</sup> August 2019, the PV glass temperature was hotter than the electrolyte temperatures. The electrolyser inlets were always hotter than outlets (not shown).

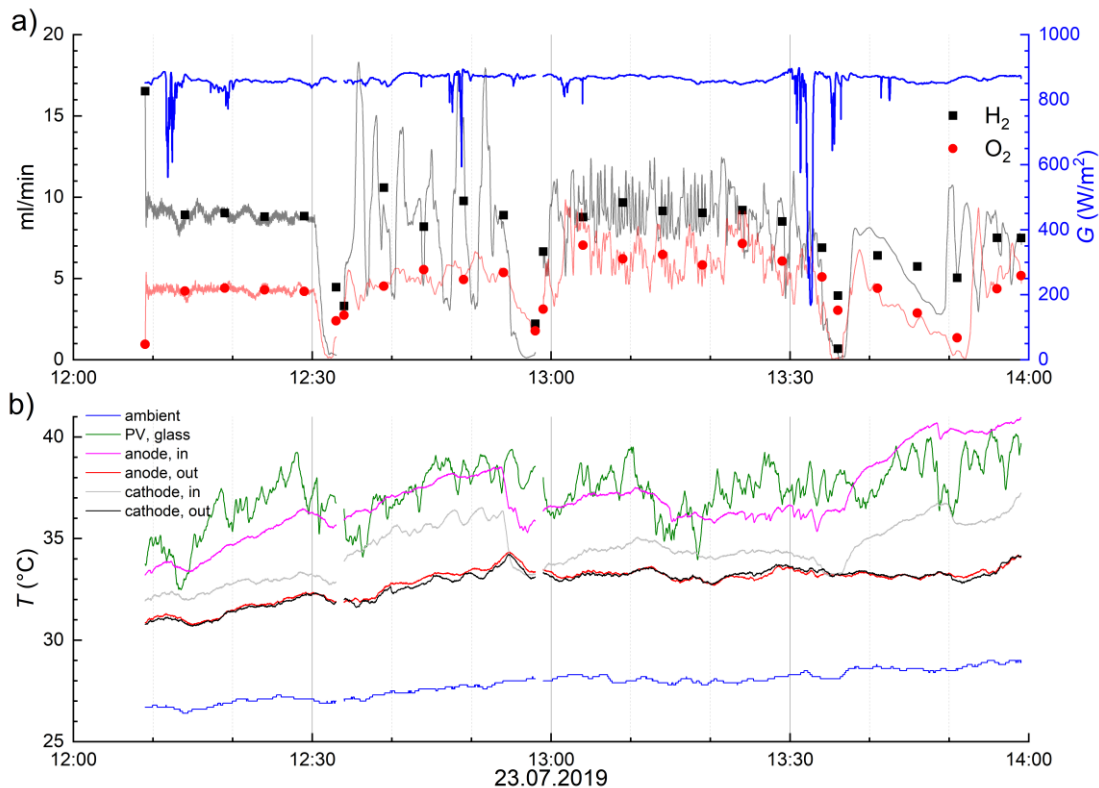

**Figure S4.1.** Time dependent profiles measured on 23<sup>rd</sup> July 2019 of a)  $H_2$  and  $O_2$  flow rates and solar irradiance. Flow rate transients are averaged over 60 seconds (lines) and 5 minutes (squares and circles) to reduce noise in the signal. b) Time dependent profiles measured on 23<sup>rd</sup> July 2019 of ambient, PV glass and electrolyte temperatures.



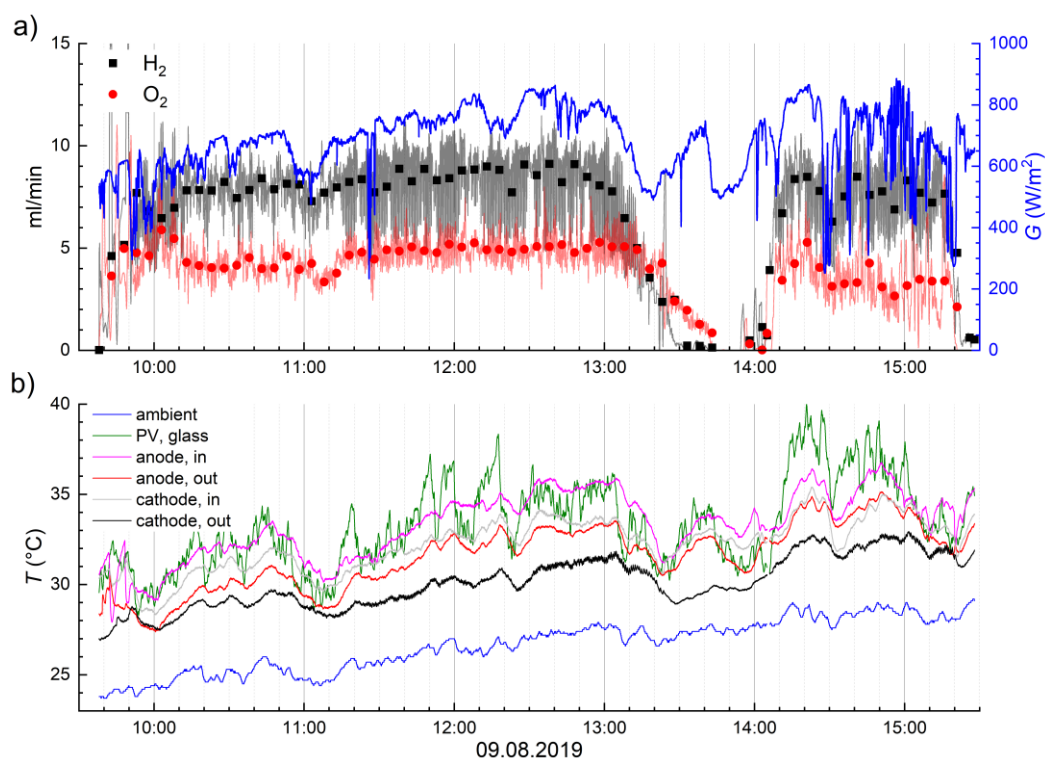

**Figure S4.2.** Time dependent profiles measured on 9<sup>th</sup> August 2019 of a)  $H_2$  and  $O_2$  flow rates and solar irradiance. Flow rate transients are averaged over 60 seconds (lines) and 5 minutes (squares and circles) to reduce noise in the signal. b) Time dependent profiles measured on 9<sup>th</sup> August 2019 of ambient, PV glass and electrolyte temperatures

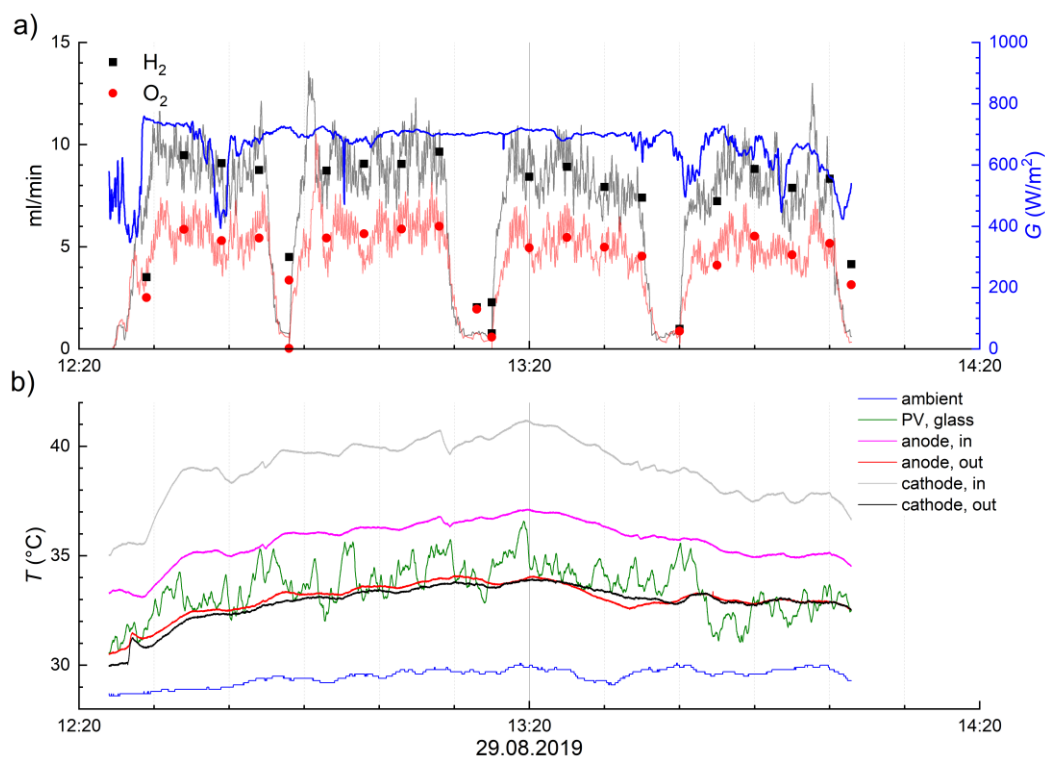

**Figure S4.3.** Time dependent profiles measured on 29<sup>th</sup> August 2019 of a)  $H_2$  and  $O_2$  flow rates and solar irradiance. Flow rate transients are averaged over 60 seconds (lines) and 5 minutes (squares and circles) to reduce noise in the signal. b) Time dependent profiles measured on 29<sup>th</sup> August 2019 of ambient, PV glass and electrolyte temperatures.

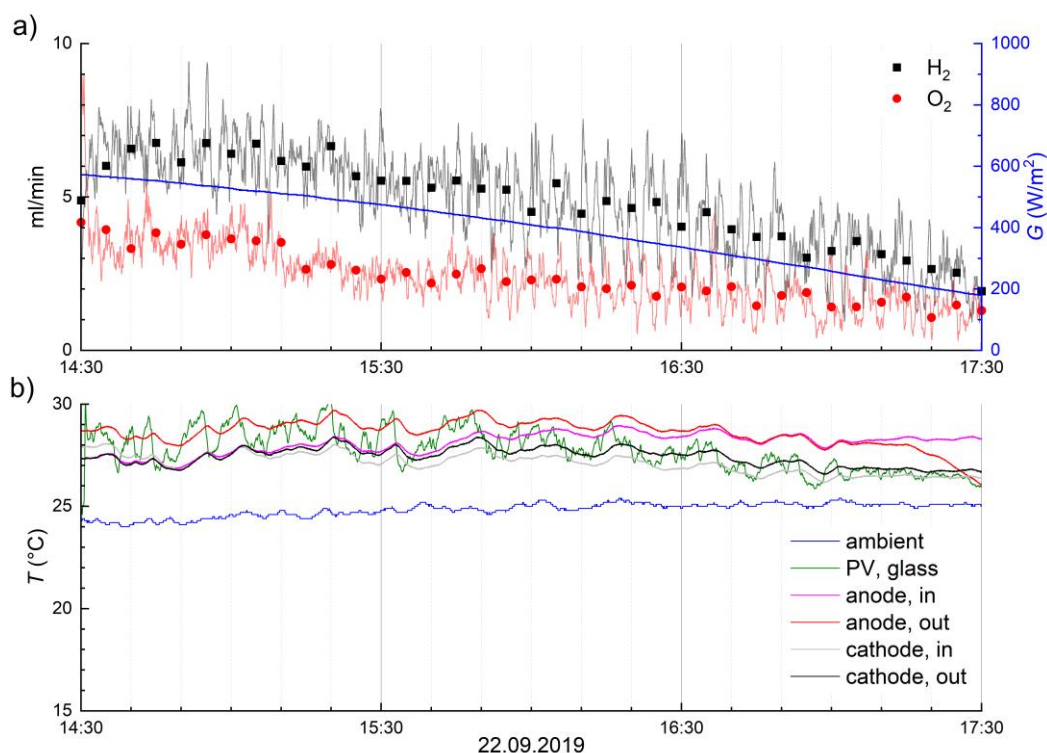

**Figure S4.4.** Time dependent profiles measured on 22<sup>nd</sup> September 2019 of a)  $H_2$  and  $O_2$  flow rates and solar irradiance. Flow rate transients are averaged over 60 seconds (lines) and 5 minutes (squares and circles) to reduce noise in the signal. b) Time dependent profiles measured on 22<sup>nd</sup> September 2019 of ambient, PV glass and electrolyte temperatures.

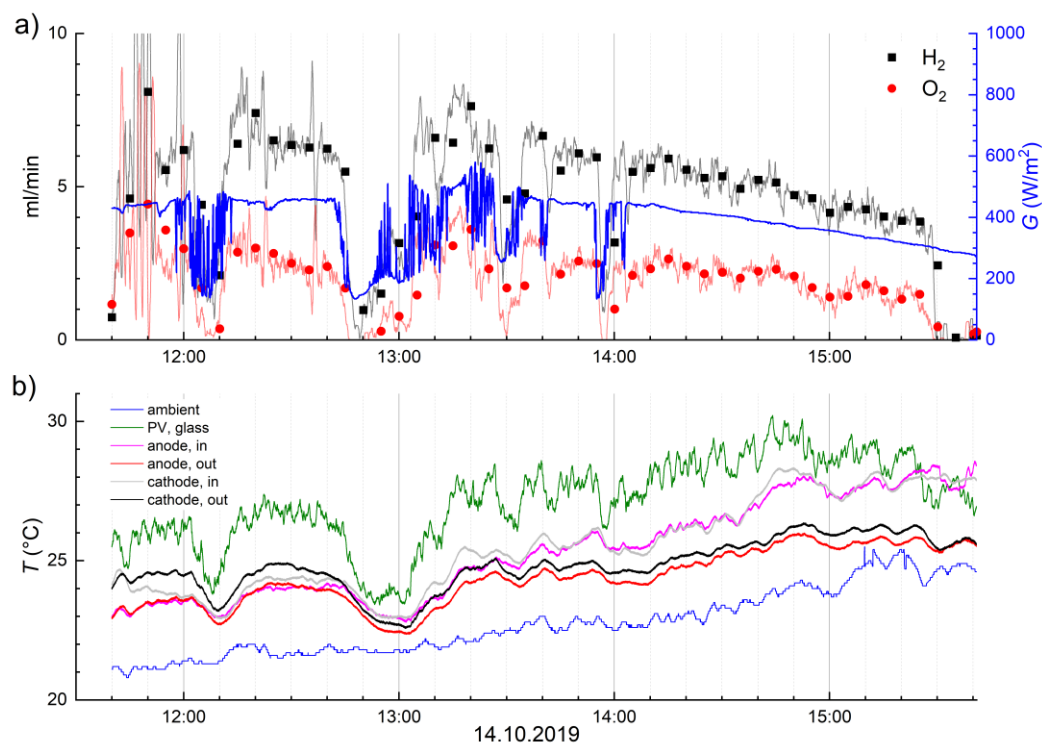

**Figure S4.5.** Time dependent profiles measured on 14<sup>th</sup> October 2019 of a)  $H_2$  and  $O_2$  flow rates and solar irradiance. Flow rate transients are averaged over 60 seconds (lines) and 5 minutes (squares and circles) to reduce noise in the signal. b) Time dependent profiles measured on 14<sup>th</sup> October 2019 of ambient, PV glass and electrolyte temperatures.

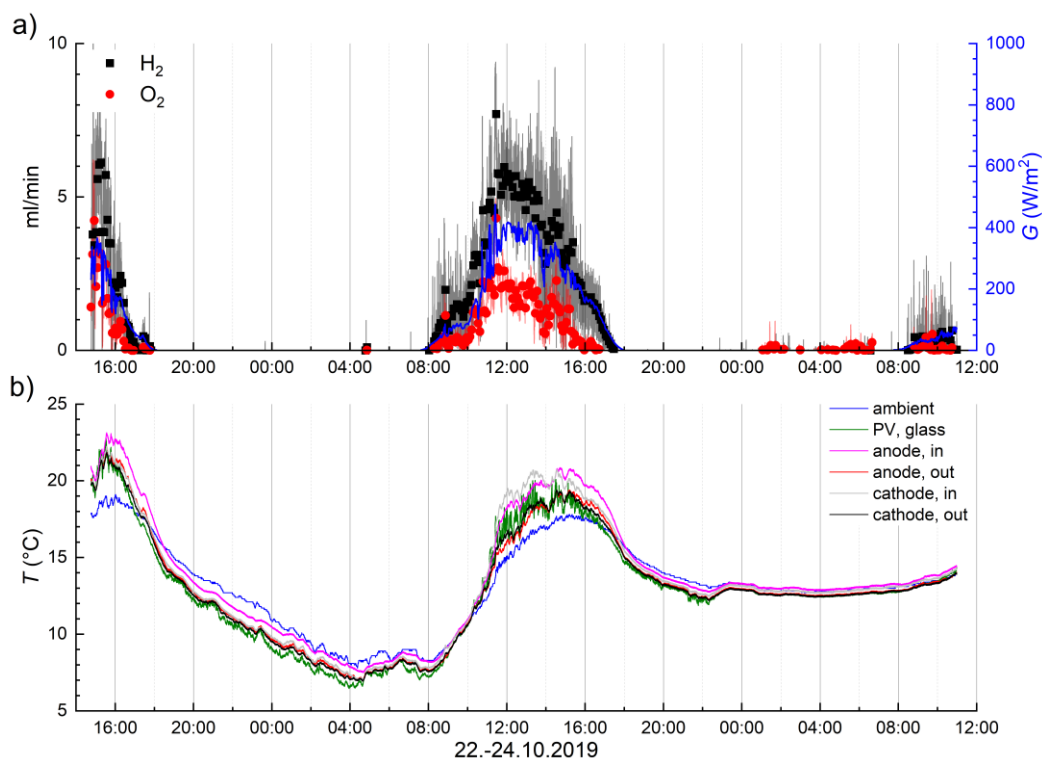

**Figure S4.6.** Time dependent profiles measured from 22<sup>nd</sup> to 24<sup>th</sup> October 2019 of a) H<sub>2</sub> and O<sub>2</sub> flow rates and solar irradiance. Flow rate transients are averaged over 60 seconds (lines) and 5 minutes (squares and circles) to reduce noise in the signal. b) Time dependent profiles measured from 22<sup>nd</sup> to 24<sup>th</sup> October 2019 of ambient, PV glass and electrolyte temperatures.

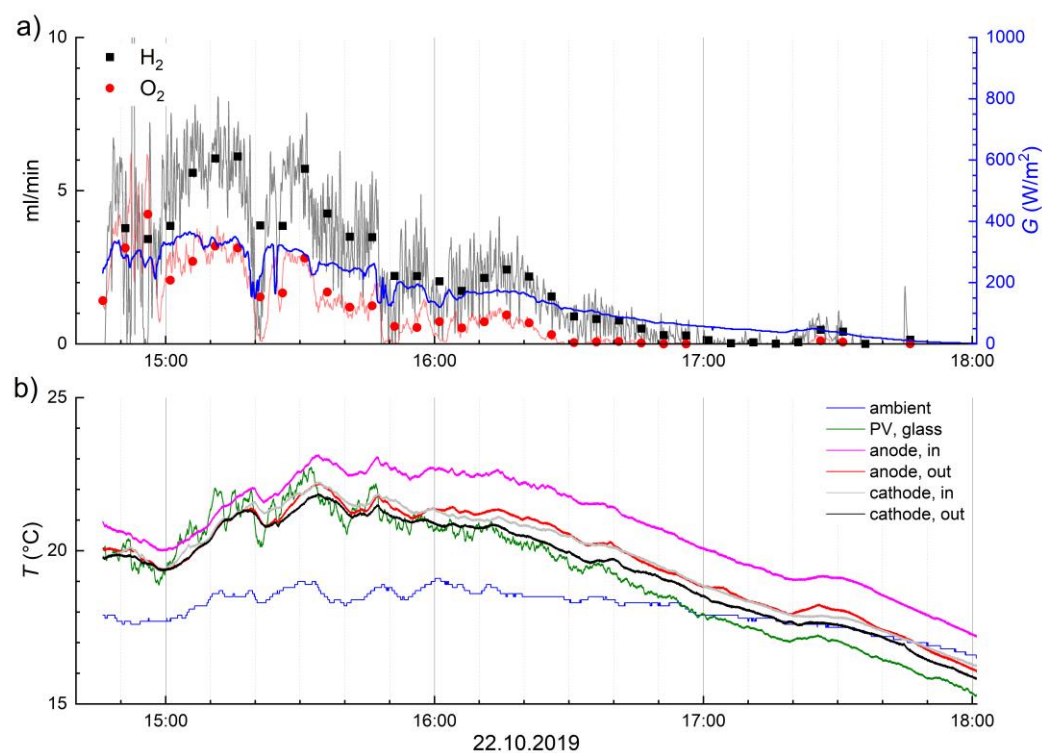

**Figure S4.7.** Time dependent profiles measured on 22<sup>nd</sup> October 2019 of a) H<sub>2</sub> and O<sub>2</sub> flow rates and solar irradiance. Flow rate transients are averaged over 60 seconds (lines) and 5 minutes (squares and circles) to reduce noise in the signal. b) Time dependent profiles measured on 22<sup>nd</sup> October 2019 of ambient, PV glass and electrolyte temperatures.

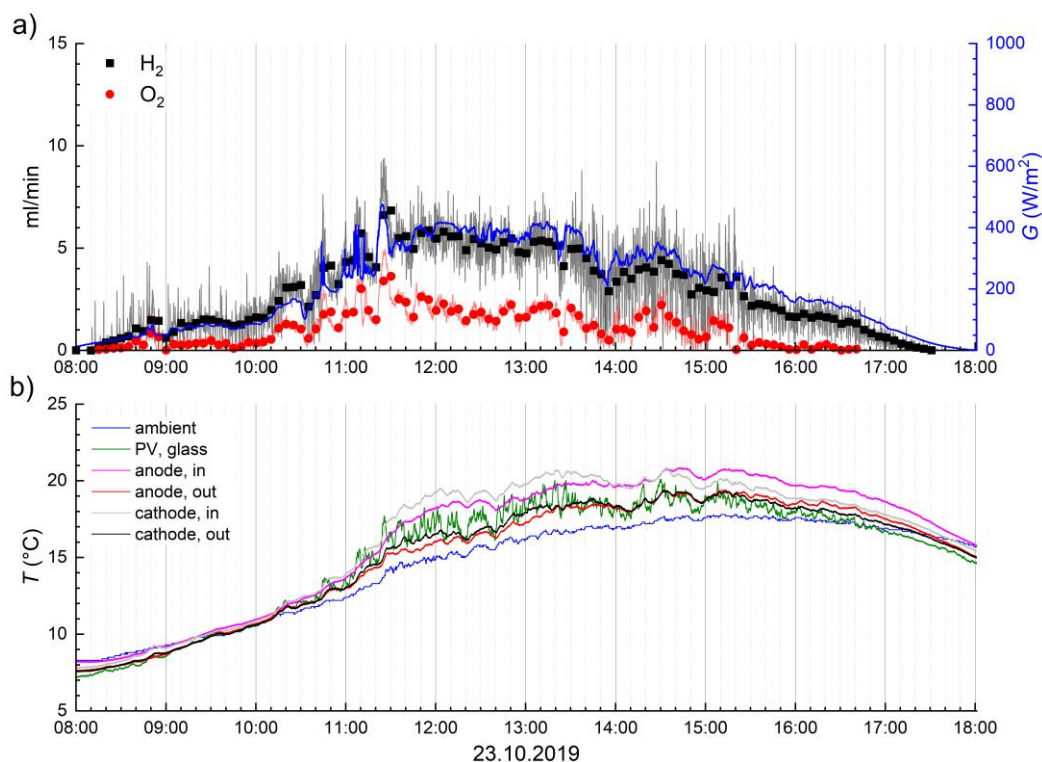

**Figure S4.8.** Time dependent profiles measured on 23<sup>rd</sup> October 2019 of a)  $H_2$  and  $O_2$  flow rates and solar irradiance and (b) ambient, PV glass and electrolyte temperatures.

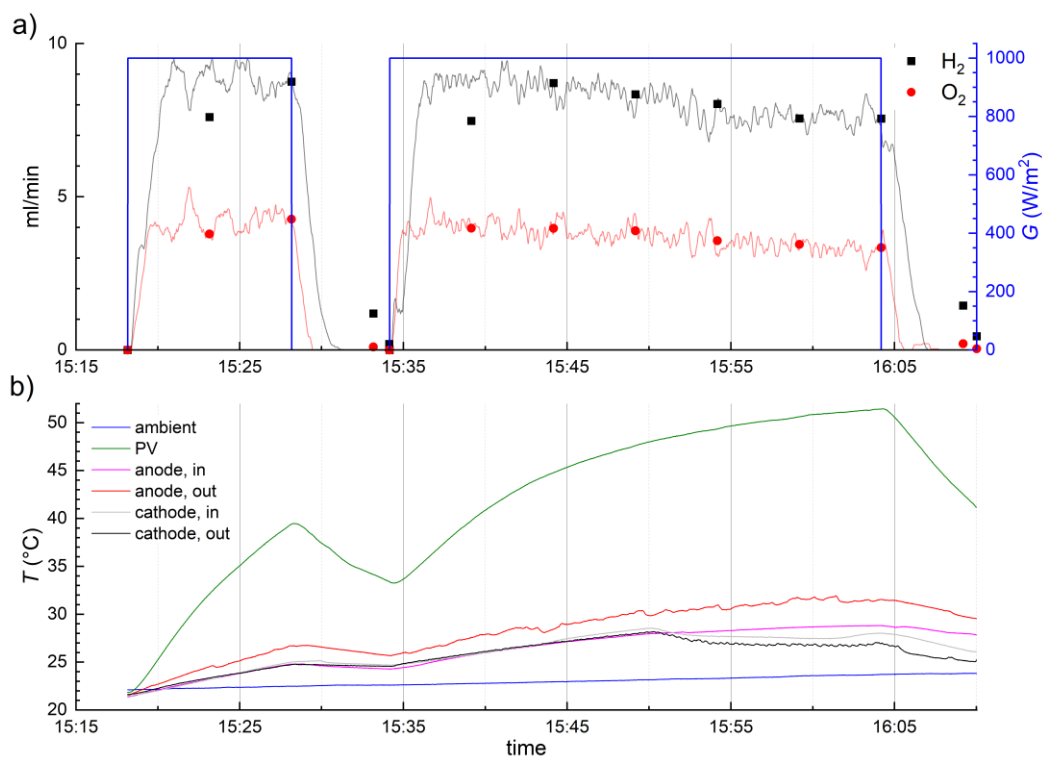

**Figure S4.9.** Time dependent profiles from the first indoor measurement of a)  $H_2$  and  $O_2$  flow rates and the irradiance setting of the solar simulator. Flow rate transients were averaged over 60 seconds (lines) and 5 minutes (squares and circles) to reduce noise in the signal. b) Time dependent profiles measured for ambient, PV and electrolyte temperatures.

For the illustration of the temperature distribution of the PV surface, we show a thermography image in Figure S4.10. The recording was taken on 6<sup>th</sup> September 2019 at 9:55 (see also Figure 5). The PV temperature transient indicated about 20 °C temperature, and the Pt 100 thermometer was placed at the location indicated by the red “X”, corresponding to approximately 22–23 °C temperature, the maximum temperature at a small spot being a little less than 27 °C, and 25–26 °C over a larger area. At the time of recording, wind was blowing from southwest–west, probably contributing to the nonsymmetric distribution.

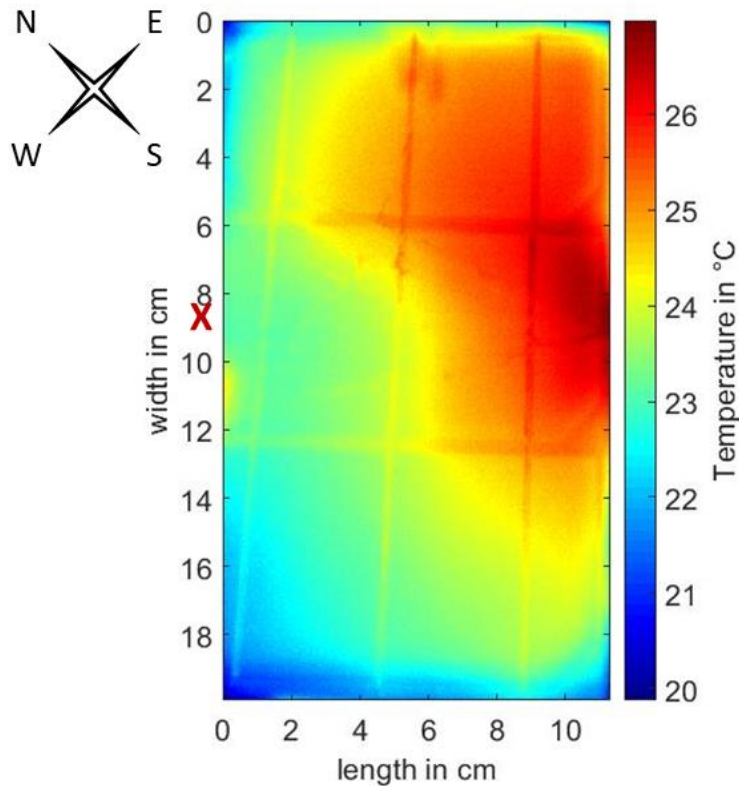

**Figure S4.10.** Thermographic image of the PV glass surface taken at 09:55 on 6<sup>th</sup> September 2019 during outdoor exposure with the approximate cardinal directions. The outlets are to the left of the figure, and inlets to the right. The edges and busbars of the PV cells are distinguishable as straight lines (compare to Figure 1.). The slight distortion is due to perspective. The approximate location of the temperature sensor is marked with the red “X”. Cathode is above the horizontal centre line (cutting the width axis at ca. 9 cm) and anode below it.



## 5. Supplementary graphs for the performance analysis

Figure S5.1. shows the STH efficiency plotted against the PV temperature with the irradiance indicated on the color scale. The slope of the outdoor points is roughly  $-0.23\%/^{\circ}\text{C}$  (absolute change in the STH efficiency).

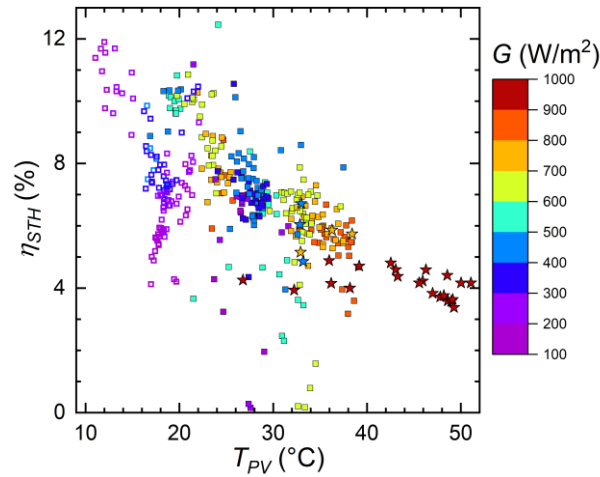

**Figure S5.1.** The STH efficiency as a function of PV temperature. Outdoor data marked with squares (open squares 22.–24.10.2019), indoor with stars.

Figure S5.2. shows the hydrogen generation rate and STH efficiency as a function of the ambient temperature and irradiance. The general pattern is similar to Figure 8., but the indoor measurements are clearly shifted to cooler temperatures with respect to the outdoor measurements.

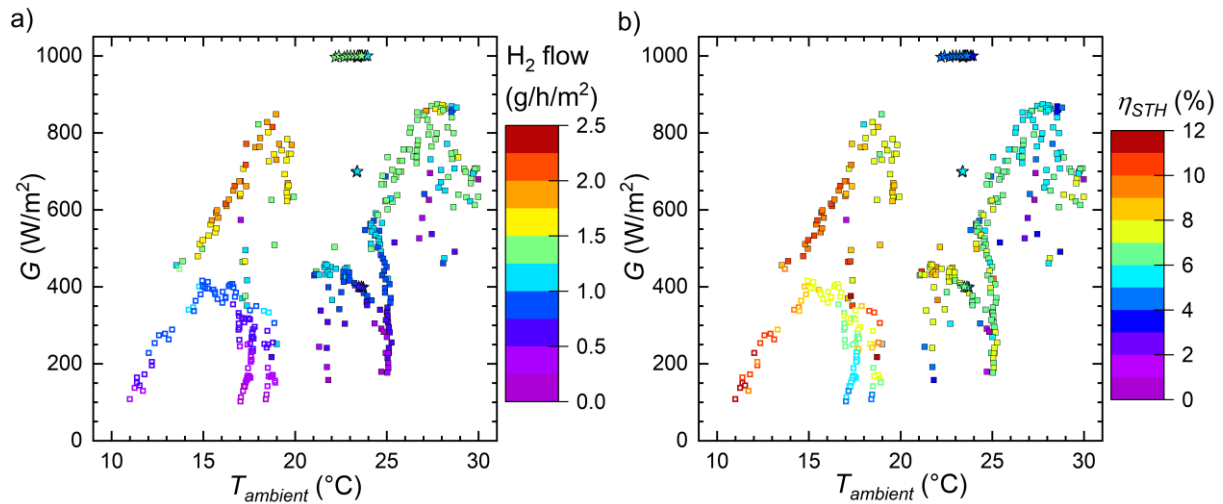

**Figure S5.2.** The STH efficiency as a function of the ambient temperature. Outdoor data marked with squares (open squares 22.–24.10.2019), indoor with stars.

Figure S5.3. shows the STH efficiency as a function of ambient temperature with a logarithmic y-axis to illustrate that the data would fit an exponential function as well as linear (compare with Figure 10). The efficiency trend of equation (4) for the outdoor data is indicated with the dashed line.

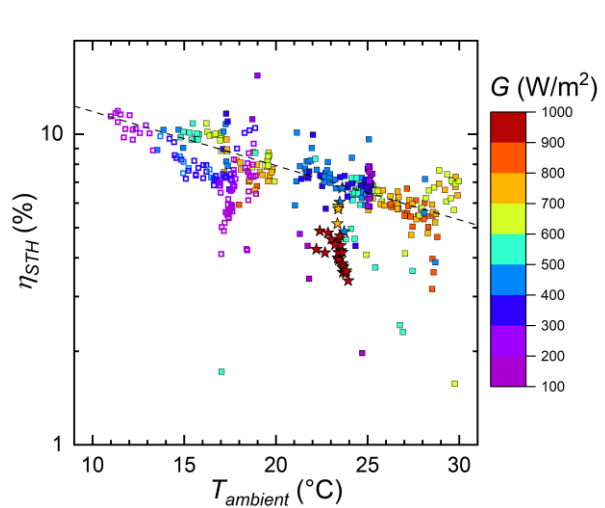

**Figure S5.3.** The STH efficiency as a function of ambient temperature plotted with a logarithmic y-axis, illustrating that the outdoors data would fit an exponential as well as a linear decrease. Outdoor data marked with squares (open squares 22.–24.10.2019), indoor with stars.

The outflow ratio as a function of the cathodic outflow is shown in Figure S5.4. The general trend is similar to using the anodic outflow as the x-axis, but the scatter of the data at low outflows is higher. However, above ca. 10 ml/min the ratio seems to increase slightly, suggesting that low current density could have contributed to the deviation from 2.0 outflow ratio.

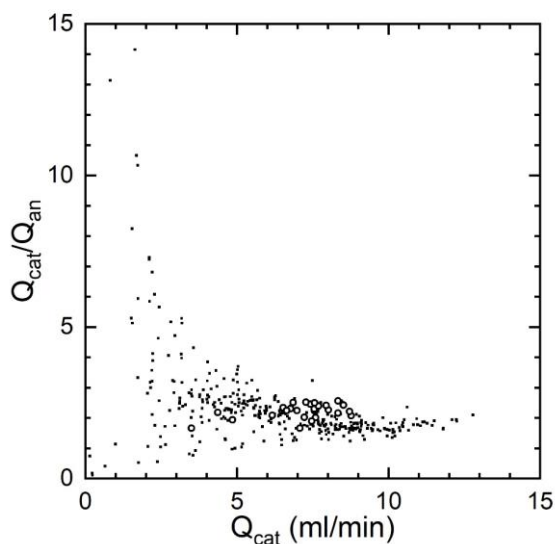

**Figure S5.4.** The outflow ratio as the function of the cathodic outflow. Outdoor measurements marked with solid markers, indoor with open circles.

The outflow ratio as a function of the ambient conditions is shown in Figure S5.5. Black markers correspond to values less than 0.5 and grey to over 3.5. As can be seen, the outflow ratio increases as irradiance decreases, and the ambient temperature does not seem to have obvious effects to the outflow ratio. As mentioned related to Figure 10, the highest ratios occurred in the last outdoor measurement, so degradation might also play a role, although later indoor the ratio was closer to 2.0.

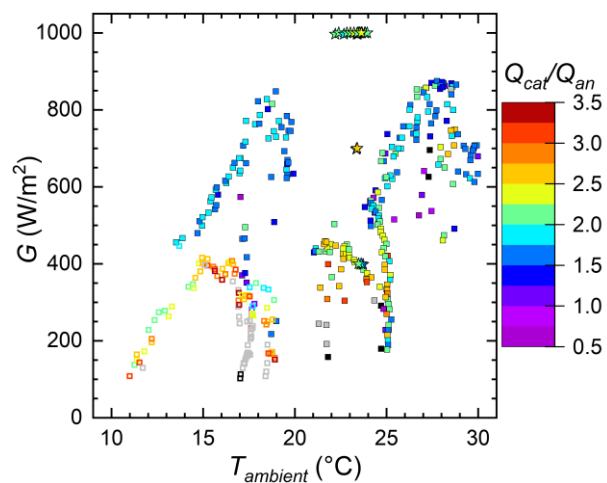

**Figure S5.5.** The outflow ratio as a function of the ambient conditions. The black markers correspond to values less than 0.5 and grey to more than 3.5.

## References

- 1 S. Rondinini, P. Longhi, P. R. Mussini and T. Mussini, *Pure Appl. Chem.*, 1994, **66**, 641–647.
- 2 J. R. Swierk, S. Klaus, L. Trotochaud, A. T. Bell and T. D. Tilley, *J. Phys. Chem. C*, 2015, **119**, 19022–19029.
